# Supplementary material
Source: ML conference proceedings conference paper supplement (https://proceedings.mlr.press/v80/zhang18o.html)
Supplement: Supplementary file [file zhang18o-supp.pdf]

---

## Supplementary Material of “Dynamic Regret of Strongly Adaptive Methods”

---

Lijun Zhang<sup>1</sup> Tianbao Yang<sup>2</sup> Rong Jin<sup>3</sup> Zhi-Hua Zhou<sup>1</sup>

### A. Proof of Lemma 1

We first prove the first part of Lemma 1. Let  $k = \lfloor \log_K t \rfloor$ . Then, integer  $t$  can be represented in the base- $K$  number system as

$$t = \sum_{j=0}^k \beta_j K^j.$$

From the definition of base- $K$  ending time, integers that are no larger than  $t$  and alive at  $t$  are

$$\left\{ \begin{array}{l} 1 * K^0 + \sum_{j=1}^k \beta_j K^j, 2 * K^0 + \sum_{j=1}^k \beta_j K^j, \dots, \beta_0 * K^0 + \sum_{j=1}^k \beta_j K^j \\ 1 * K^1 + \sum_{j=2}^k \beta_j K^j, 2 * K^1 + \sum_{j=2}^k \beta_j K^j, \dots, \beta_1 * K^1 + \sum_{j=2}^k \beta_j K^j \\ \dots \\ 1 * K^{k-1} + \beta_k K^k, 1 * K^{k-1} + \beta_k K^k, \dots, \beta_{k-1} * K^{k-1} + \beta_k K^k \\ 1 * K^k, 2 * K^k, \dots, \beta_k K^k \end{array} \right\}.$$

The total number of alive integers are upper bounded by

$$\sum_{i=0}^k \beta_i \leq (k+1)(K-1) = (\lfloor \log_K t \rfloor + 1)(K-1).$$

We proceed to prove the second part of Lemma 1. Let  $k = \lfloor \log_K r \rfloor$ , and the representation of  $r$  in the base- $K$  number system be

$$r = \sum_{j=0}^k \beta_j K^j.$$

We generate a sequence of segments as

$$\begin{aligned}
 I_1 &= [t_1, e^{t_1} - 1] = \left[ \sum_{j=0}^k \beta_j K^j, (\beta_1 + 1)K^1 + \sum_{j=2}^k \beta_j K^j - 1 \right], \\
 I_2 &= [t_2, e^{t_2} - 1] = \left[ (\beta_1 + 1)K^1 + \sum_{j=2}^k \beta_j K^j, (\beta_2 + 1)K^2 + \sum_{j=3}^k \beta_j K^j - 1 \right], \\
 I_3 &= [t_3, e^{t_3} - 1] = \left[ (\beta_2 + 1)K^2 + \sum_{j=3}^k \beta_j K^j, (\beta_3 + 1)K^3 + \sum_{j=4}^k \beta_j K^j - 1 \right], \\
 &\dots \\
 I_k &= [t_k, e^{t_k} - 1] = [(\beta_{k-1} + 1)K^{k-1} + \beta_k K^k, (\beta_k + 1)K^k - 1], \\
 I_{k+1} &= [t_{k+1}, e^{t_{k+1}} - 1] = [(\beta_k + 1)K^k, K^{k+1} - 1], \\
 I_{k+2} &= [t_{k+2}, e^{t_{k+2}} - 1] = [K^{k+1}, K^{k+2} - 1], \\
 &\dots
 \end{aligned}$$

until  $s$  is covered. It is easy to verify that

$$t_{m+1} > t_m + K^{m-1} - 1.$$

Thus,  $s$  will be covered by the first  $m$  intervals as long as

$$t_m + K^{m-1} - 1 \geq s.$$

A sufficient condition is

$$r + K^{m-1} - 1 \geq s$$

which is satisfied when

$$m = \lceil \log_K(s - r + 1) \rceil + 1.$$

## B. Proof of Theorem 1

From the second part of Lemma 1, we know that there exist  $m$  segments

$$I_j = [t_j, e^{t_j} - 1], \quad j \in [m]$$

with  $m \leq \lceil \log_K(s - r + 1) \rceil + 1$ , such that

$$t_1 = r, \quad e^{t_j} = t_{j+1}, \quad j \in [m-1], \quad \text{and } e^{t_m} > s.$$

Furthermore, the expert  $E^{t_j}$  is alive during the period  $[t_j, e^{t_j} - 1]$ .

Using Claim 3.1 of Hazan & Seshadhri (2009), we have

$$\sum_{t=t_j}^{e^{t_j}-1} f_t(\mathbf{w}_t) - f_t(\mathbf{w}_t^{t_j}) \leq \frac{1}{\alpha} \left( \log t_j + 2 \sum_{t=t_j+1}^{e^{t_j}-1} \frac{1}{t} \right), \quad \forall j \in [m-1]$$

where  $\mathbf{w}_{t_j}^{t_j}, \dots, \mathbf{w}_{e^{t_j}-1}^{t_j}$  is the sequence of solutions generated by the expert  $E^{t_j}$ . Similarly, for the last segment, we have

$$\sum_{t=t_m}^s f_t(\mathbf{w}_t) - f_t(\mathbf{w}_t^{t_m}) \leq \frac{1}{\alpha} \left( \log t_m + 2 \sum_{t=t_m+1}^s \frac{1}{t} \right).$$

By adding things together, we have

$$\begin{aligned} & \sum_{j=1}^{m-1} \left( \sum_{t=t_j}^{e^{t_j}-1} f_t(\mathbf{w}_t) - f_t(\mathbf{w}_t^{t_j}) \right) + \sum_{t=t_m}^s f_t(\mathbf{w}_t) - f_t(\mathbf{w}_t^{t_m}) \\ & \leq \frac{1}{\alpha} \sum_{j=1}^m \log t_j + \frac{2}{\alpha} \sum_{t=r+1}^s \frac{1}{t} \leq \frac{m+2}{\alpha} \log T. \end{aligned} \quad (8)$$

According to the property of online Newton step (Hazan et al., 2007, Theorem 2), we have, for any  $\mathbf{w} \in \Omega$ ,

$$\sum_{t=t_j}^{e^{t_j}-1} f_t(\mathbf{w}_t^{t_j}) - f_t(\mathbf{w}) \leq 5d \left( \frac{1}{\alpha} + GB \right) \log T, \quad \forall j \in [m-1] \quad (9)$$

and

$$\sum_{t=t_m}^s f_t(\mathbf{w}_t^{t_m}) - f_t(\mathbf{w}) \leq 5d \left( \frac{1}{\alpha} + GB \right) \log T. \quad (10)$$

Combining (8), (9), and (10), we have,

$$\sum_{t=r}^s f_t(\mathbf{w}_t) - \sum_{t=r}^s f_t(\mathbf{w}) \leq \left( \frac{(5d+1)m+2}{\alpha} + 5dmGB \right) \log T$$

for any  $\mathbf{w} \in \Omega$ .

## C. Proof of Lemma 2

The gradient of  $\exp(-\alpha f(\mathbf{w}))$  is

$$\nabla \exp(-\alpha f(\mathbf{w})) = \exp(-\alpha f(\mathbf{w})) - \alpha \nabla f(\mathbf{w}) = -\alpha \exp(-\alpha f(\mathbf{w})) \nabla f(\mathbf{w}).$$

and the Hessian is

$$\begin{aligned} \nabla^2 \exp(-\alpha f(\mathbf{w})) &= -\alpha \exp(-\alpha f(\mathbf{w})) - \alpha \nabla f(\mathbf{w}) \nabla^\top f(\mathbf{w}) - \alpha \exp(-\alpha f(\mathbf{w})) \nabla^2 f(\mathbf{w}) \\ &= \alpha \exp(-\alpha f(\mathbf{w})) \left( \alpha \nabla f(\mathbf{w}) \nabla^\top f(\mathbf{w}) - \nabla^2 f(\mathbf{w}) \right). \end{aligned}$$

Thus,  $f(\cdot)$  is  $\alpha$ -exp-concave if

$$\alpha \nabla f(\mathbf{w}) \nabla^\top f(\mathbf{w}) \preceq \nabla^2 f(\mathbf{w}).$$

We complete the proof by noticing

$$\frac{\lambda}{G^2} \nabla f(\mathbf{w}) \nabla^\top f(\mathbf{w}) \preceq \lambda I \preceq \nabla^2 f(\mathbf{w}).$$

## D. Proof of Theorem 2

Lemma 2 implies that all the  $\lambda$ -strongly convex functions are also  $\frac{\lambda}{G^2}$ -exp-concave. As a result, we can reuse the proof of Theorem 1. Specifically, (8) with  $\alpha = \frac{\lambda}{G^2}$  becomes

$$\sum_{j=1}^{m-1} \left( \sum_{t=t_j}^{e^{t_j}-1} f_t(\mathbf{w}_t) - f_t(\mathbf{w}_t^{t_j}) \right) + \sum_{t=t_m}^s f_t(\mathbf{w}_t) - f_t(\mathbf{w}_t^{t_m}) \leq \frac{(m+2)G^2}{\lambda} \log T. \quad (11)$$

According to the property of online gradient descent (Hazan et al., 2007, Theorem 1), we have, for any  $\mathbf{w} \in \Omega$ ,

$$\sum_{t=t_j}^{e^{t_j}-1} f_t(\mathbf{w}_t^{t_j}) - f_t(\mathbf{w}) \leq \frac{G^2}{2\lambda} (1 + \log T), \quad \forall j \in [m-1] \quad (12)$$

and

$$\sum_{t=t_m}^s f_t(\mathbf{w}_t^{t_m}) - f_t(\mathbf{w}) \leq \frac{G^2}{2\lambda}(1 + \log T). \quad (13)$$

Combining (11), (12), and (13), we have,

$$\sum_{t=r}^s f_t(\mathbf{w}_t) - \sum_{t=r}^s f_t(\mathbf{w}) \leq \frac{G^2}{2\lambda}(m + (3m + 4) \log T)$$

for any  $\mathbf{w} \in \Omega$ .

## E. Proof of Theorem 4

As pointed out by Daniely et al. (2015), the static regret of online gradient descent (Zinkevich, 2003) over any interval of length  $\tau$  is upper bounded by  $3BG\sqrt{\tau}$ . Combining this fact with Theorem 2 of Jun et al. (2017), we get Theorem 4 in this paper.

## F. Proof of Corollary 5

To simplify the upper bound in Theorem 3, we restrict to intervals of the same length  $\tau$ , and in this case  $k = T/\tau$ . Then, we have

$$\begin{aligned} \text{D-Regret}(\mathbf{w}_1^*, \dots, \mathbf{w}_T^*) &\leq \min_{1 \leq \tau \leq T} \sum_{i=1}^k (\text{SA-Regret}(T, \tau) + 2\tau V_T(i)) \\ &= \min_{1 \leq \tau \leq T} \left( \frac{\text{SA-Regret}(T, \tau)T}{\tau} + 2\tau \sum_{i=1}^k V_T(i) \right) \\ &\leq \min_{1 \leq \tau \leq T} \left( \frac{\text{SA-Regret}(T, \tau)T}{\tau} + 2\tau V_T \right). \end{aligned}$$

Combining with Theorem 4, we have

$$\text{D-Regret}(\mathbf{w}_1^*, \dots, \mathbf{w}_T^*) \leq \min_{1 \leq \tau \leq T} \left( \frac{(c + 8\sqrt{7\log T + 5})T}{\sqrt{\tau}} + 2\tau V_T \right).$$

where  $c = 12BG/(\sqrt{2} - 1)$ .

In the following, we consider two cases. If  $V_T \geq \sqrt{\log T/T}$ , we choose

$$\tau = \left( \frac{T\sqrt{\log T}}{V_T} \right)^{2/3} \leq T$$

and have

$$\begin{aligned} \text{D-Regret}(\mathbf{w}_1^*, \dots, \mathbf{w}_T^*) &\leq \frac{(c + 8\sqrt{7\log T + 5})T^{2/3}V_T^{1/3}}{\log^{1/6} T} + 2T^{2/3}V_T^{1/3} \log^{1/3} T \\ &\leq \frac{(c + 8\sqrt{5})T^{2/3}V_T^{1/3}}{\log^{1/6} T} + (2 + 8\sqrt{7})T^{2/3}V_T^{1/3} \log^{1/3} T. \end{aligned}$$

Otherwise, we choose  $\tau = T$ , and have

$$\begin{aligned} \text{D-Regret}(\mathbf{w}_1^*, \dots, \mathbf{w}_T^*) &\leq (c + 8\sqrt{7\log T + 5})\sqrt{T} + 2TV_T \\ &\leq (c + 8\sqrt{7\log T + 5})\sqrt{T} + 2T\sqrt{\frac{\log T}{T}} \\ &\leq (c + 9\sqrt{7\log T + 5})\sqrt{T}. \end{aligned}$$

In summary, we have

$$\begin{aligned} \text{D-Regret}(\mathbf{w}_1^*, \dots, \mathbf{w}_T^*) &\leq \max \left\{ \begin{aligned} &(c + 9\sqrt{7\log T + 5})\sqrt{T} \\ &\frac{(c + 8\sqrt{5})T^{2/3}V_T^{1/3}}{\log^{1/6} T} + 24T^{2/3}V_T^{1/3} \log^{1/3} T \end{aligned} \right. \\ &= O \left( \max \left\{ \sqrt{T \log T}, T^{2/3}V_T^{1/3} \log^{1/3} T \right\} \right). \end{aligned}$$

## G. Proof of Corollary 6

The first part of Corollary 6 is a direct consequence of Theorem 1 by setting  $K = \lceil T^{1/\gamma} \rceil$ .

Now, we prove the second part. Following similar analysis of Corollary 5, we have

$$\text{D-Regret}(\mathbf{w}_1^*, \dots, \mathbf{w}_T^*) \leq \min_{1 \leq \tau \leq T} \left\{ \left( \frac{(5d+1)(\gamma+1)+2}{\alpha} + 5d(\gamma+1)GB \right) \frac{T \log T}{\tau} + 2\tau V_T \right\}.$$

Then, we consider two cases. If  $V_T \geq \log T/T$ , we choose

$$\tau = \sqrt{\frac{T \log T}{V_T}} \leq T$$

and have

$$\text{D-Regret}(\mathbf{w}_1^*, \dots, \mathbf{w}_T^*) \leq \left( \frac{(5d+1)(\gamma+1)+2}{\alpha} + 5d(\gamma+1)GB + 2 \right) \sqrt{TV_T \log T}.$$

Otherwise, we choose  $\tau = T$ , and have

$$\begin{aligned} \text{D-Regret}(\mathbf{w}_1^*, \dots, \mathbf{w}_T^*) &\leq \left( \frac{(5d+1)(\gamma+1)+2}{\alpha} + 5d(\gamma+1)GB \right) \log T + 2TV_T \\ &\leq \left( \frac{(5d+1)(\gamma+1)+2}{\alpha} + 5d(\gamma+1)GB \right) \log T + 2T \frac{\log T}{T} \\ &= \left( \frac{(5d+1)(\gamma+1)+2}{\alpha} + 5d(\gamma+1)GB + 2 \right) \log T. \end{aligned}$$

In summary, we have

$$\begin{aligned} \text{D-Regret}(\mathbf{w}_1^*, \dots, \mathbf{w}_T^*) &\leq \left( \frac{(5d+1)(\gamma+1)+2}{\alpha} + 5d(\gamma+1)GB + 2 \right) \max \left\{ \log T, \sqrt{TV_T \log T} \right\} \\ &= O \left( d \cdot \max \left\{ \log T, \sqrt{TV_T \log T} \right\} \right). \end{aligned}$$

## H. Proof of Corollary 7

The first part of Corollary 7 is a direct consequence of Theorem 2 by setting  $K = \lceil T^{1/\gamma} \rceil$ .

The proof of the second part is similar to that of Corollary 6. First, we have

$$\begin{aligned} \text{D-Regret}(\mathbf{w}_1^*, \dots, \mathbf{w}_T^*) &\leq \min_{1 \leq \tau \leq T} \left\{ \frac{G^2}{2\lambda} (\gamma+1 + (3\gamma+7) \log T) \frac{T}{\tau} + 2\tau V_T \right\} \\ &\leq \min_{1 \leq \tau \leq T} \left\{ \frac{(\gamma+5\gamma \log T)G^2 T}{\lambda \tau} + 2\tau V_T \right\} \end{aligned}$$

where the last inequality is due to the condition  $\gamma > 1$ .

Then, we consider two cases. If  $V_T \geq \log T/T$ , we choose

$$\tau = \sqrt{\frac{T \log T}{V_T}} \leq T$$

and have

$$\begin{aligned} \text{D-Regret}(\mathbf{w}_1^*, \dots, \mathbf{w}_T^*) &\leq \frac{\gamma G^2}{\lambda} \sqrt{\frac{TV_T}{\log T}} + \frac{5\gamma G^2}{\lambda} \sqrt{TV_T \log T} + 2\sqrt{TV_T \log T} \\ &= \frac{\gamma G^2}{\lambda} \sqrt{\frac{TV_T}{\log T}} + \left( \frac{5\gamma G^2}{\lambda} + 2 \right) \sqrt{TV_T \log T}. \end{aligned}$$

Otherwise, we choose  $\tau = T$ , and have

$$\begin{aligned} \text{D-Regret}(\mathbf{w}_1^*, \dots, \mathbf{w}_T^*) &\leq \frac{(\gamma + 5\gamma \log T)G^2}{\lambda} + 2TV_T \\ &\leq \frac{(\gamma + 5\gamma \log T)G^2}{\lambda} + 2T \frac{\log T}{T} \\ &= \frac{\gamma G^2}{\lambda} + \left( \frac{5\gamma G^2}{\lambda} + 2 \right) \log T. \end{aligned}$$

In summary, we have

$$\begin{aligned} \text{D-Regret}(\mathbf{w}_1^*, \dots, \mathbf{w}_T^*) &\leq \max \begin{cases} \frac{\gamma G^2}{\lambda} + \left( \frac{5\gamma G^2}{\lambda} + 2 \right) \log T \\ \frac{\gamma G^2}{\lambda} \sqrt{\frac{TV_T}{\log T}} + \left( \frac{5\gamma G^2}{\lambda} + 2 \right) \sqrt{TV_T \log T} \end{cases} \\ &= O \left( \max \left\{ \log T, \sqrt{TV_T \log T} \right\} \right). \end{aligned}$$
